# Supplementary material
Source: publisher figshare collection journal article supplement (https://acs.figshare.com/ndownloader/files/5516525)
Supplement: Supplementary file 1 [file 5516525]

## Supporting Information

### Chemically Regenerative Redox Fuel Cells Using Iron Redox Couple as a Liquid Catalyst with Cocatalysts

*Sang-Beom Han,<sup>1</sup> Da-Hee Kwak,<sup>1</sup> Hyun Suk Park,<sup>1</sup> In-Ae Choi,<sup>1</sup> Jin-Young Park,<sup>1</sup>  
Kyeng-Bae Ma,<sup>1</sup> Ji-Eun Won,<sup>1</sup> Do-Hyoung Kim,<sup>1</sup> Si-Jin Kim,<sup>1</sup> Min-Cheol Kim,<sup>1</sup> and  
Kyung-Won Park<sup>1\*</sup>*

<sup>1</sup> Department of Chemical Engineering, Soongsil University, Seoul 06978, Republic of  
Korea

\* Corresponding author. Tel: 82-2-820-0613. Fax: 82-2-812-5378.

E-mail address: [kwpark@ssu.ac.kr](mailto:kwpark@ssu.ac.kr) (Prof. K.-W. Park).

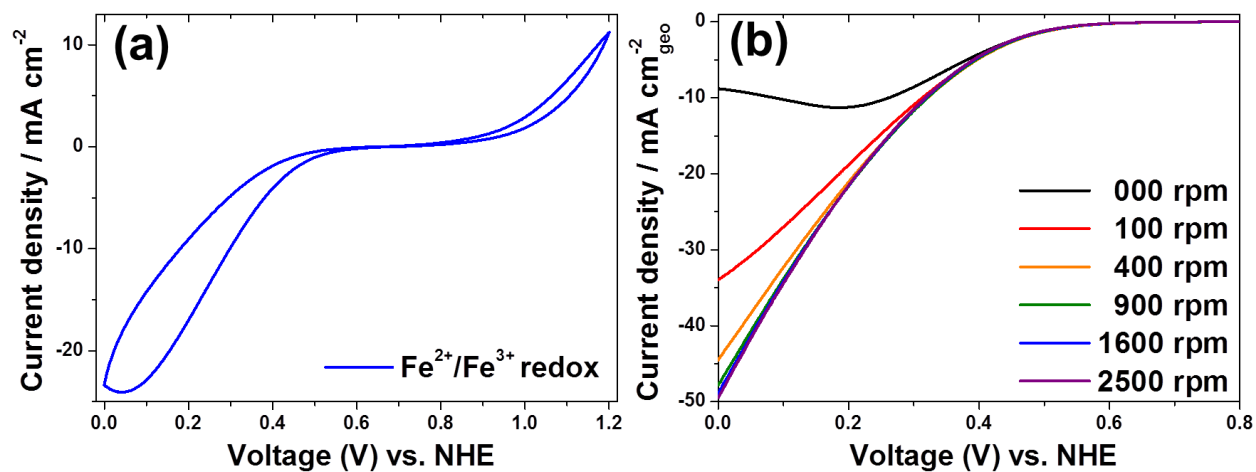

**Figure S1.** (a) CV of iron redox couple as a liquid catalyst in the solution of  $\text{Fe}_2(\text{SO}_4)_3 + \text{H}_2\text{SO}_4$  on the carbon electrode. (b) LSVs of  $\text{Fe}^{3+}$ -reduction with varying rotating speeds on the glassy carbon electrode in the solution of  $\text{Fe}_2(\text{SO}_4)_3 + \text{H}_2\text{SO}_4$ .

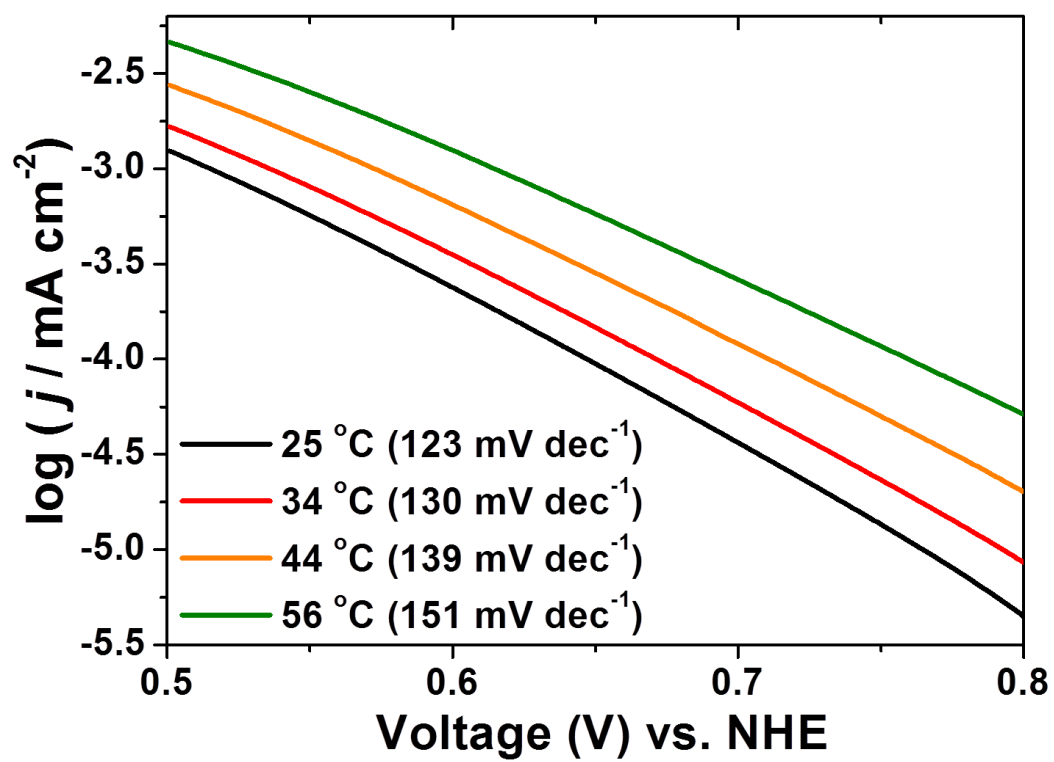

**Figure S2.** Tafel plots of Fe<sup>3+</sup>-reduction measured on the glassy carbon electrode in the solution of Fe<sub>2</sub>(SO<sub>4</sub>)<sub>3</sub> + H<sub>2</sub>SO<sub>4</sub> at varying reaction temperatures.

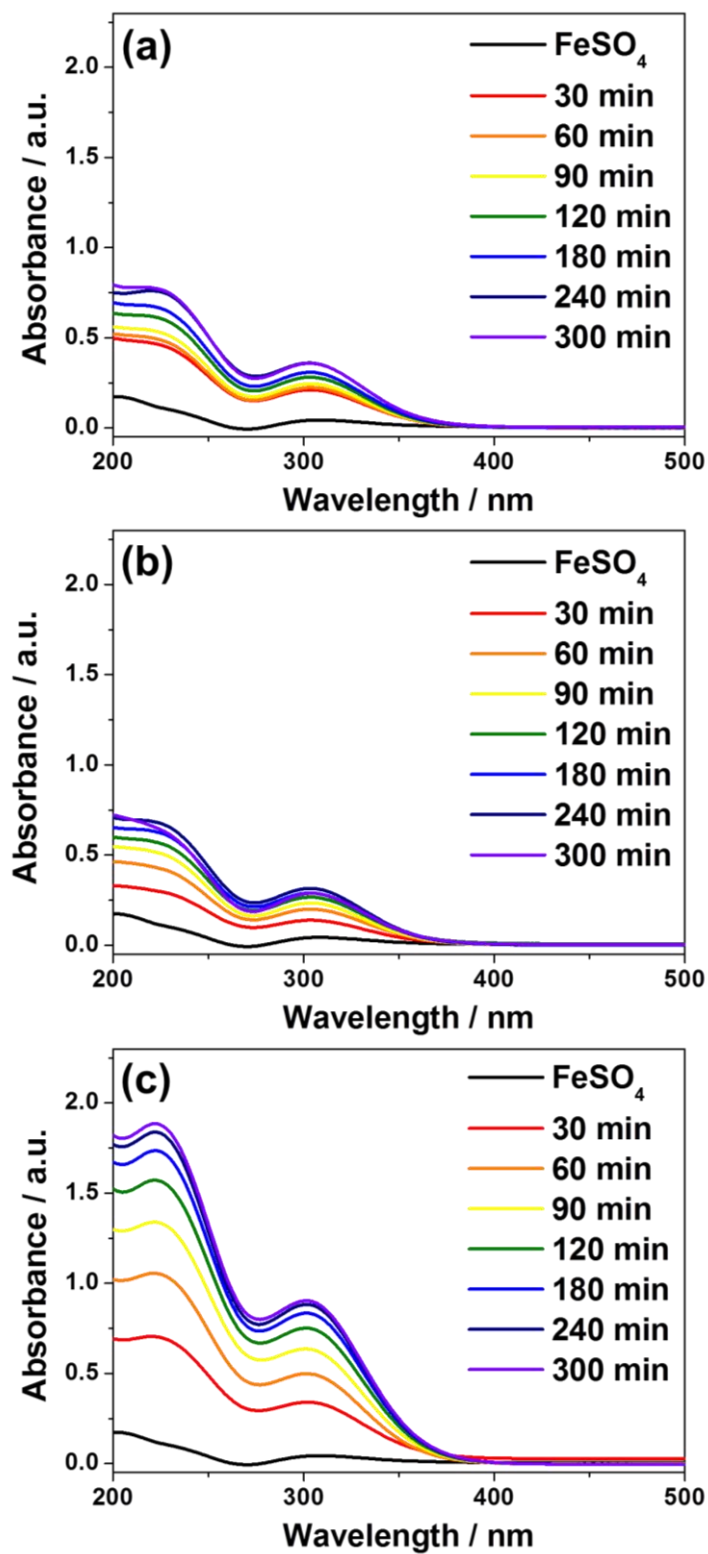

**Figure S3.** UV-vis absorbance spectra of the solutions of 0.5 M  $\text{FeSO}_4$  + 1 M  $\text{H}_2\text{SO}_4$  after  $\text{O}_2$  bubbling as a function of reaction time (a) in the absence of cocatalysts and in the presence of (b) Fe-TMPP and (c) Fe-Pc.

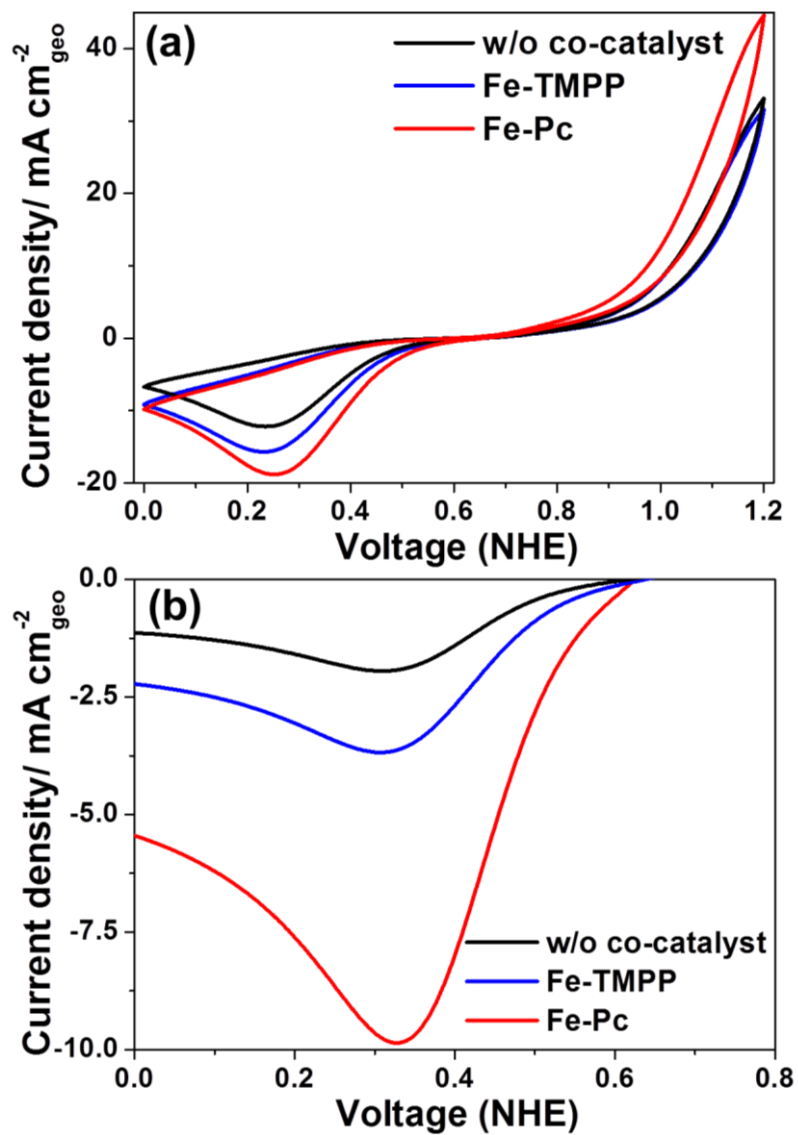

**Figure S4.** (a) CVs and (b) LSVs of the Fe<sup>3+</sup>-containing solutions oxidized with Fe<sup>2+</sup> via O<sub>2</sub> for 5 h in the absence and the presence of cocatalysts without rotating the electrode.

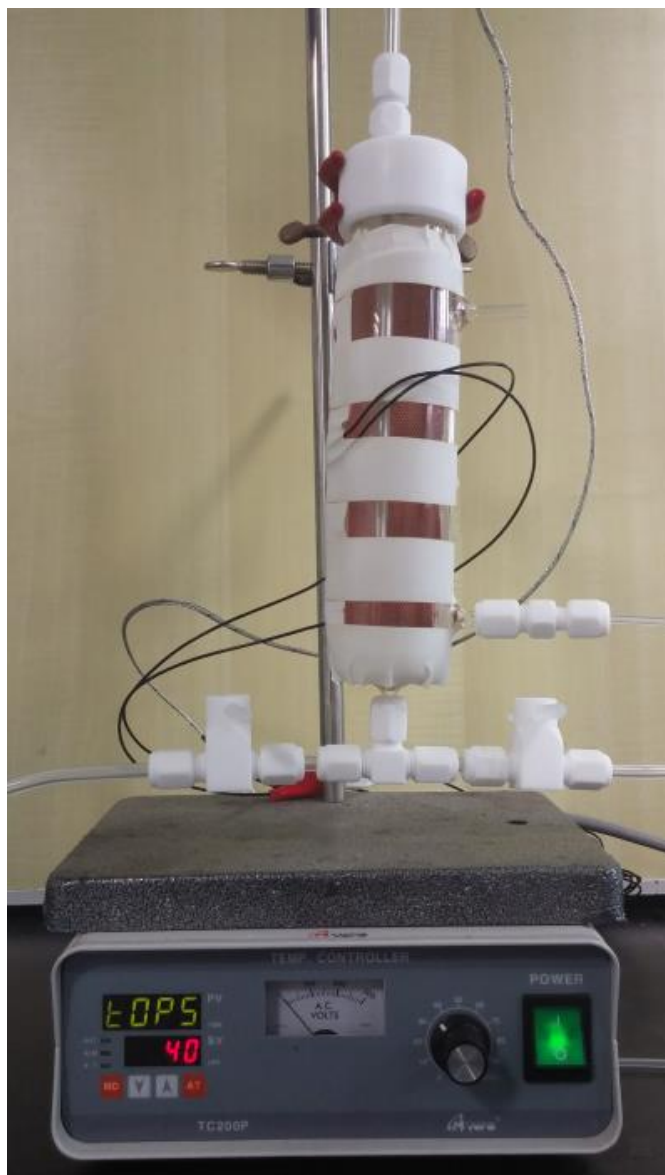

**Figure S5.** Regeneration reactor for electrochemical reactions in half and unit cells: The solution of 0.5 M  $\text{FeSO}_4$  + 1 M  $\text{H}_2\text{SO}_4$  (200 mL) was supplied to the reactor and then maintained at 80 °C for 5 h under  $\text{O}_2$  bubbling.

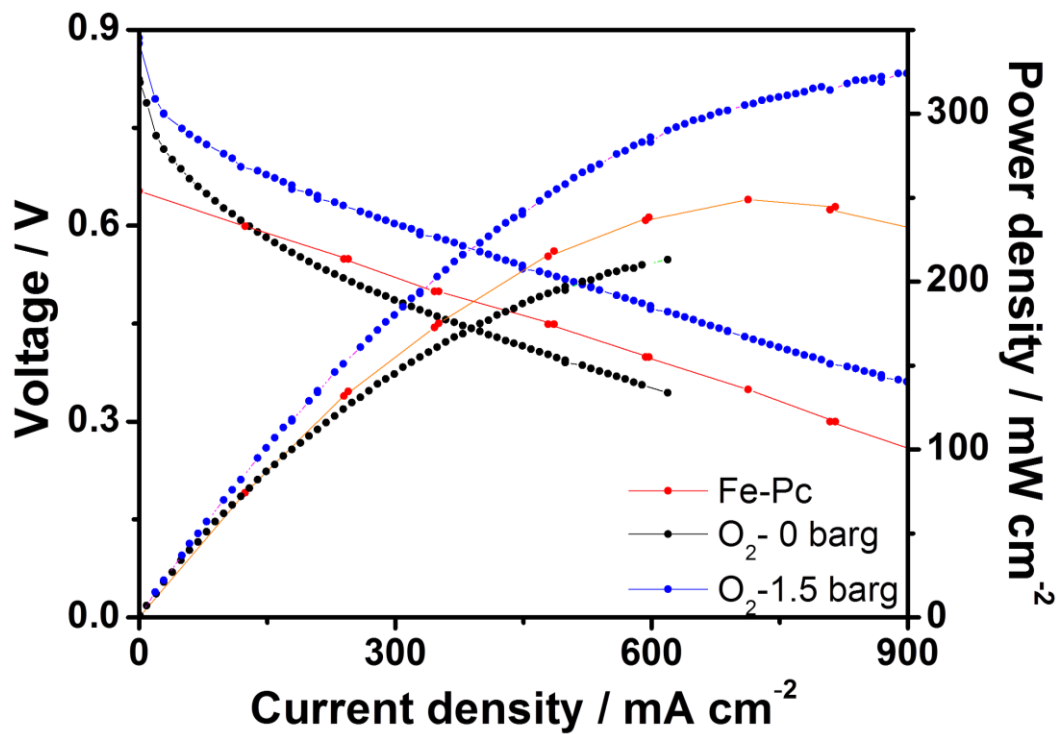

**Figure S6.** Comparison of polarization curve using the reduction reaction of the liquid catalyst with standard PEM with Fe/N<sub>4</sub> electrode as cathode catalysts. The standard unit cell measurement was carried out at 80 °C by supplying H<sub>2</sub> as a fuel at the anode with a flow rate of 150 mL·min<sup>-1</sup> and O<sub>2</sub> at the cathode with a flow rate of 200 mL·min<sup>-1</sup>.
